# Supplementary material for: VGF Peptides in Cerebrospinal Fluid of Patients with Dementia with Lewy Bodies
Source: PubMed Central journal article supplement (PMC6801397; doi:10.3390/ijms20194674), 2019-09-20
Supplement: ijms-20-04674-s001.pdf [file ijms-20-04674-s001.pdf]

## VGF Peptides in cerebrospinal fluid of patients with dementia with Lewy Bodies

Inger van Steenoven 1,2,\* , Barbara Noli 3, Cristina Cocco 3, Gian-Luca Ferri 3, Patrick Oeckl 4, Markus Otto 4, Marleen J.A. Koel-Simmelink 2, Claire Bridel 2, Wiesje M. van der Flier 1,5, Afina W. Lemstra 1 and Charlotte E. Teunissen 1,2

- <sup>1</sup> Alzheimer Center Amsterdam, Department of Neurology, Amsterdam Neuroscience, Vrije Universiteit Amsterdam, Amsterdam UMC, Amsterdam, The Netherlands
  - <sup>2</sup> Neurochemistry Laboratory and Biobank, Department of Clinical Chemistry, Amsterdam Neuroscience, Vrije Universiteit Amsterdam, Amsterdam UMC, Amsterdam, The Netherlands
  - <sup>3</sup> NEF-laboratory, Department of Biomedical Sciences, University of Cagliari, Monserrato, Italy
  - <sup>4</sup> Department of Neurology, Ulm University Hospital, Ulm, Germany
  - <sup>5</sup> Department of Epidemiology and Biostatistics, Amsterdam Neuroscience, Vrije Universiteit Amsterdam, Amsterdam UMC, Amsterdam, The Netherlands
- \* Correspondence: i.vansteenoven@amsterdamumc.nl; Tel.: +31-20-4440685

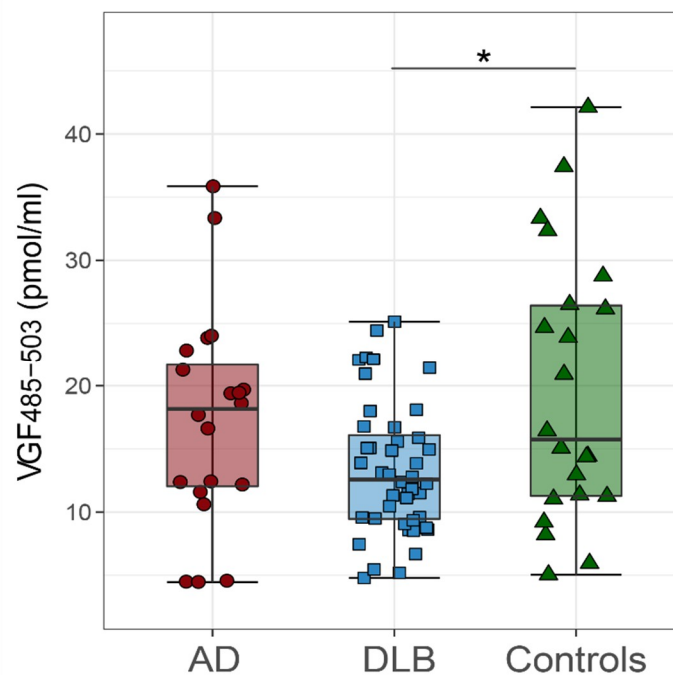

**Figure S1. CSF VGF<sub>485-503</sub> levels in DLB, AD and controls**

The line through the middle of the boxed corresponds to the median and the lower and the upper lines to the 25<sup>th</sup> and 75<sup>th</sup> percentile, respectively. The whiskers extend from the 5<sup>th</sup> percentile on the bottom to the 95<sup>th</sup> percentile on the top. Differences between groups were assessed with GLM corrected for age and sex. AD = Alzheimer's disease; DLB = dementia with Lewy bodies; VGF = Neurosecretory protein VGF.

\* p<0.05

**Table S1. Associations between CSF biomarkers**

| Protein                                   | Total group (n=86)              |          | DLB (n=44)                      |          | AD (n=20)                       |          | Controls (n=22)                 |          |
|-------------------------------------------|---------------------------------|----------|---------------------------------|----------|---------------------------------|----------|---------------------------------|----------|
|                                           | VGF <sub>373-417</sub><br>ELISA | VGF SRM  | VGF <sub>373-417</sub><br>ELISA | VGF SRM  | VGF <sub>373-417</sub><br>ELISA | VGF SRM  | VGF <sub>373-417</sub><br>ELISA | VGF SRM  |
| <b>VGF<sub>373-417</sub><br/>ELISA</b>    | -                               | 0.892*** | -                               | 0.894*** | -                               | 0.908*** | -                               | 0.834*** |
| <b>VGF SRM</b>                            | 0.892***                        | -        | 0.894***                        | -        | 0.908***                        | -        | 0.834***                        | -        |
| <b>A<math>\beta</math><sub>1-42</sub></b> | 0.111                           | 0.024    | 0.057                           | -0.111   | -0.250                          | -0.296   | 0.509*                          | 0.735*** |
| <b>tau</b>                                | 0.285**                         | 0.328**  | 0.551***                        | 0.624*** | 0.326                           | 0.418    | 0.787***                        | 0.857*** |
| <b>p-tau</b>                              | 0.361***                        | 0.436*** | 0.563***                        | 0.657*** | 0.415                           | 0.508*   | 0.679***                        | 0.778*** |
| <b><math>\alpha</math>-synuclein</b>      | 0.621***                        | 0.624*** | 0.731***                        | 0.748*** | NA                              | NA       | 0.910***                        | 0.914*** |

Associations were assessed with spearman correlation coefficient. FDR corrections were used to adjust  $p$  values for multiple comparisons. \*  $p < 0.05$ , \*\*  $p < 0.01$ , \*\*\*  $p < 0.001$

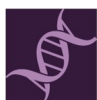

**Table S2. Effects of CSF VGF on change in cognitive performance over time**

|                                    | Estimated baseline performance |           | Estimated change over time |           |
|------------------------------------|--------------------------------|-----------|----------------------------|-----------|
|                                    | $\beta$ (SE)                   | p         | $\beta$ (SE)               | p         |
| <b>VGF<sub>373-417</sub> ELISA</b> |                                |           |                            |           |
| Memory                             |                                |           |                            |           |
| RAVLT immediate recall             | 0.20 (0.11)                    | 0.09      | -0.03 (0.02)               | 0.22      |
| RAVLT delayed recall               | 0.13 (0.12)                    | 0.28      | -0.01 (0.02)               | 0.46      |
| VAT A                              | -0.33 (0.63)                   | 0.59      | 0.12 (0.18)                | 0.48      |
| Attention                          |                                |           |                            |           |
| Digit span forward                 | -0.06 (0.13)                   | 0.63      | 0.00 (0.03)                | 0.96      |
| TMT A                              | 2.68 (0.88)                    | 0.003**   | -0.61 (0.24)               | 0.01*     |
| Stroop 1                           | 0.49 (0.51)                    | 0.33      | -0.23 (0.19)               | 0.22      |
| Stroop 2                           | 0.58 (0.59)                    | 0.32      | -0.38 (0.20)               | 0.05      |
| Executive functions                |                                |           |                            |           |
| Digit span backward                | 0.01 (0.10)                    | 0.86      | 0.00 (0.03)                | 0.99      |
| Stroop 3                           | 4.60 (1.75)                    | 0.01*     | -1.32 (0.52)               | 0.01*     |
| TMT B                              | 1.53 (0.37)                    | <0.001*** | -0.36 (0.10)               | <0.001*** |
| Letter fluency                     | 0.14 (0.13)                    | 0.30      | -0.02 (0.03)               | 0.49      |
| FAB                                | 0.42 (0.40)                    | 0.29      | -0.08 (0.10)               | 0.42      |
| Language                           |                                |           |                            |           |
| Boston Naming Test                 | 0.21 (0.13)                    | 0.11      | -0.08 (0.04)               | 0.04*     |
| Category Fluency                   | 0.24 (0.12)                    | 0.05      | -0.03 (0.03)               | 0.24      |
| Visuospatial functions             |                                |           |                            |           |
| VOSP number location               | 0.76 (0.26)                    | 0.005**   | -0.06 (0.08)               | 0.45      |
| VOSP dot counting                  | 0.12 (0.44)                    | 0.77      | 0.15 (0.14)                | 0.29      |
| <b>VGF SRM</b>                     |                                |           |                            |           |
| Memory                             |                                |           |                            |           |
| RAVLT immediate recall             | 0.24 (0.11)                    | 0.03*     | -0.05 (0.02)               | 0.07      |
| RAVLT delayed recall               | 0.16 (0.12)                    | 0.20      | -0.02 (0.02)               | 0.32      |
| VAT A                              | -0.33 (0.62)                   | 0.59      | 0.04 (0.18)                | 0.82      |
| Attention                          |                                |           |                            |           |
| Digit span forward                 | 0.02 (0.01)                    | 0.86      | 0.00 (0.03)                | 0.98      |
| TMT A                              | 2.67 (0.86)                    | 0.003**   | -0.52 (0.24)               | 0.03*     |
| Stroop 1                           | 0.72 (0.50)                    | 0.15      | -0.28 (0.18)               | 0.13      |
| Stroop 2                           | 0.55 (0.58)                    | 0.34      | -0.27 (0.19)               | 0.16      |

|                        | Estimated baseline performance |         | Estimated change over time |        |
|------------------------|--------------------------------|---------|----------------------------|--------|
|                        | $\beta$ (SE)                   | p       | $\beta$ (SE)               | p      |
| Executive functions    |                                |         |                            |        |
| Digit span backward    | 0.00 (0.10)                    | 0.97    | -0.00 (0.02)               | 0.75   |
| Stroop 3               | 4.55 (1.72)                    | 0.01*   | -1.18 (0.50)               | 0.02*  |
| TMT B                  | 1.28 (0.37)                    | 0.001** | -0.24 (0.10)               | 0.011* |
| Letter fluency         | 0.17 (0.13)                    | 0.20    | -0.00 (0.03)               | 0.95   |
| FAB                    | 0.54 (0.40)                    | 0.18    | -0.10 (0.10)               | 0.34   |
| Language               |                                |         |                            |        |
| Boston Naming Test     | 0.17 (0.13)                    | 0.20    | -0.06 (0.04)               | 0.14   |
| Category Fluency       | 0.23 (0.12)                    | 0.06    | -0.04 (0.03)               | 0.20   |
| Visuospatial functions |                                |         |                            |        |
| VOSP number location   | 0.71 (0.26)                    | 0.01*   | -0.12 (0.08)               | 0.16   |
| VOSP dot counting      | 0.22 (0.44)                    | 0.61    | 0.06 (0.14)                | 0.67   |

Data are presented as standardized  $\beta$  (SE). The models included terms for time, the biomarker under investigation and biomarker\*time interaction and sex, age and education. For all models a random intercept and fixed slope were assumed. CSF VGF levels were log-transformed and transformed to z-scores prior to analysis.  $\beta$ 's for biomarkers represent the estimated change in z-score for each standard deviated increase in biomarker level at baseline, while  $\beta'$  for the biomarker\*time interaction represent estimated change in z-score for each year of follow-up. ). Z scores for TMT and Stroop tests were inverted as higher scores indicate worse performance. \*  $p < 0.05$ , \*\*  $p < 0.01$ , \*\*\*  $p < 0.001$ .
